# Supplementary material
Source: PubMed Central journal article supplement (PMC6279242)
Supplement: NIHMS1511701-supplement-1.pdf [file NIHMS1511701-supplement-1.pdf]

## **Supplemental Information**

### **The SIK1 kinase ensures a robust extracellular ROS burst and anti-bacterial immunity by regulating BIK1 stability and RBOHD activation**

Meixiang Zhang, Yi-Hsuan Chiang, Tania Y. Toruño, DongHyuk Lee, Miaomiao Ma, Xiangxiu Liang, Neeraj K. Lal, Mark Lemos, Yi-Ju Lu, Shisong Ma, Jun Liu, Brad Day, Savithamma P. Dinesh-Kumar, Katayoon Dehesh, Daolong Dou, Jian-Min Zhou, Gitta Coaker

## Supplemental Figures

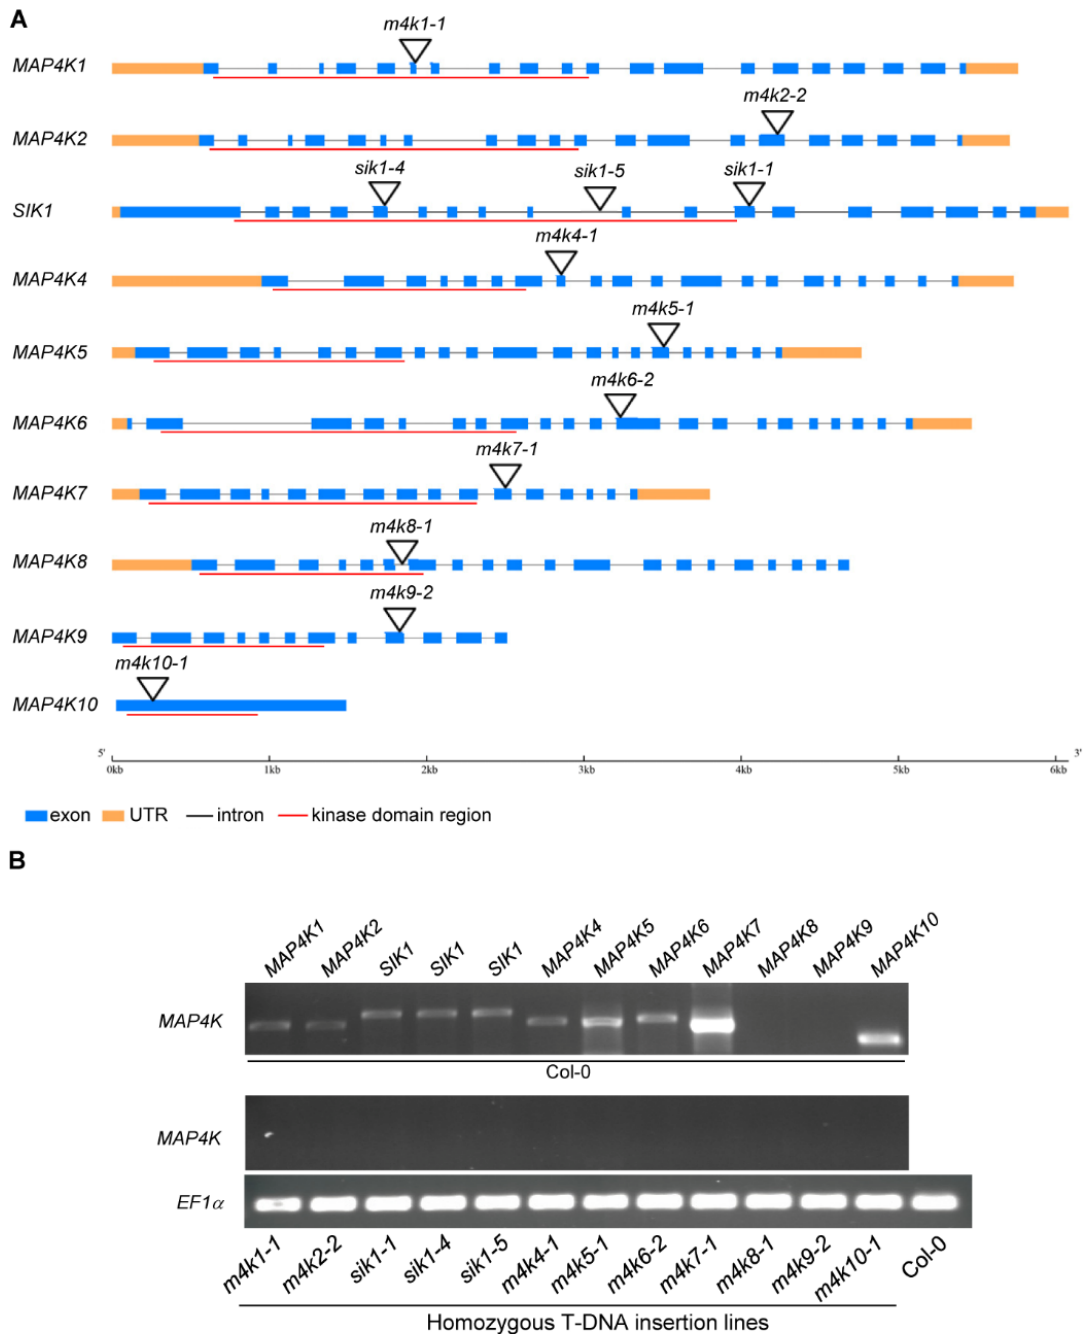

**Figure S1. Related to Figure 1. RT-PCR verified the absence of full-length CDS transcripts in each *map4k* T-DNA line.** (A) Gene structure of the *Arabidopsis* MAP4K family members and T-DNA insertion sites. (B) The absence of full-length transcripts in each *map4k* T-DNA line by RT-PCR. Top: transcript accumulation in wild-type Col-0. Bottom: transcript accumulation in individual T-DNA insertion lines.

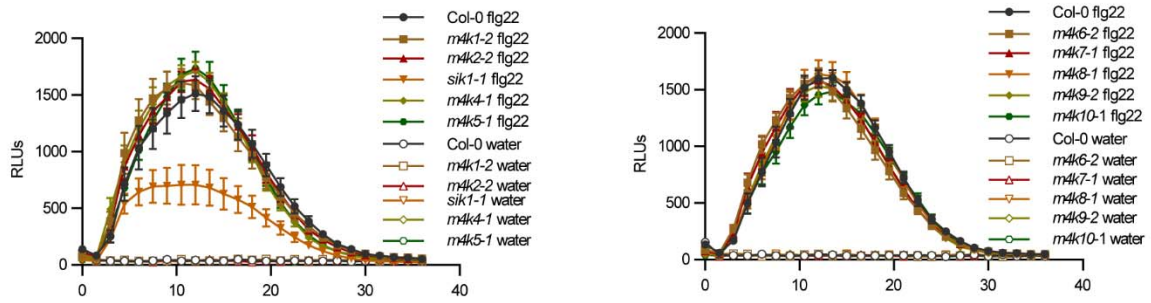

**Figure S2. Related to Figure 1. ROS burst in the *MAP4K*-DNA mutants.**

The ROS burst in the indicated lines after treatment with 100 nM flg22 or water. Values are means  $\pm$  SEM of RLU (n=12). Asterisks indicate significant differences (Fisher's LSD,  $p < 0.01$ ). Similar results were obtained in three independent experiments.

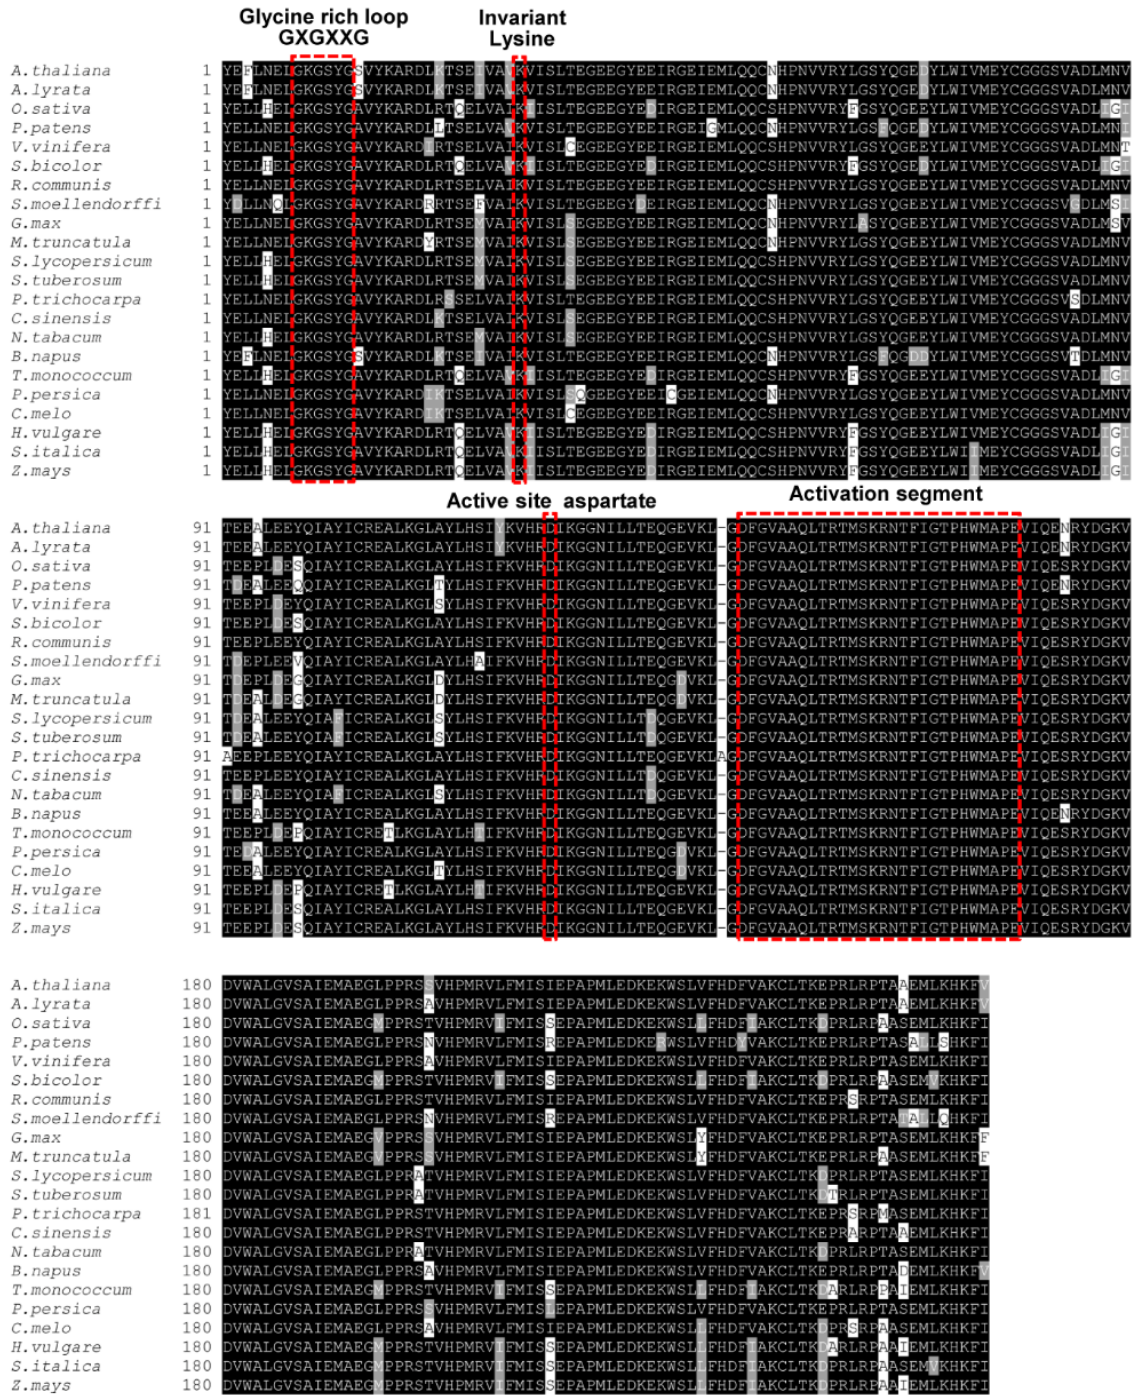

**Figure S3. Related to Figure 2. Conservation of the SIK1 kinase domain.** Amino acid alignment of the kinase domain of SIK1 homologs from different land plants. Important motifs required for kinase activity are highlighted.

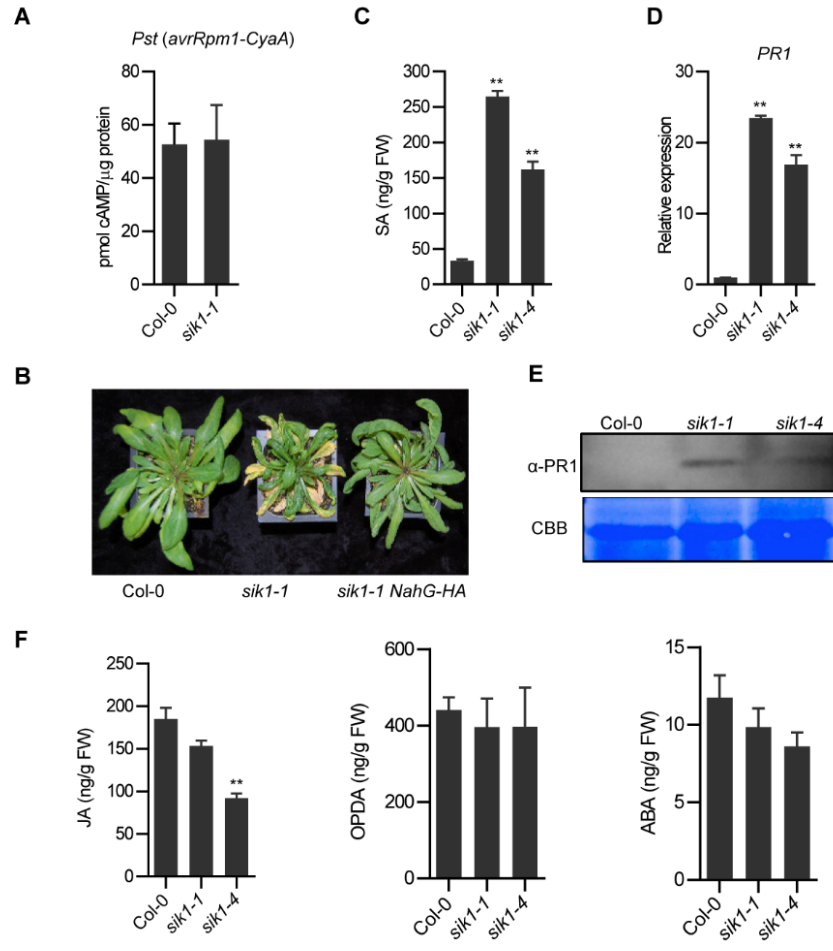

**Figure S4. Related to Figure 3. Autoimmune responses in *sik1* mutants.**

(A) The translocation of the AvrRpm1 effector is not compromised in *sik1-1*. The adenylate cyclase (CyaA) delivery assay was performed by infiltrating Col-0 and *sik1-1* with *P. syringae* carrying *avrRpm1-CyaA* at a concentration of  $3 \times 10^7$  CFU ml<sup>-1</sup>. CyaA activity depends on calmodulin in eukaryotic cells. Only fusion proteins injected into eukaryotic cells produce cAMP. Effector translocation levels were determined by quantifying cAMP after 8 h. The data are shown as means  $\pm$  SD. Similar results were obtained in three independent experiments. (B) The lesion mimic phenotype of six-week-old *sik1-1*. Flowers were removed for a clearer image. The transgenic *sik1-1* line expressing *NahG-HA* was able to rescue the lesion mimic phenotype. (C) Total SA levels in Col-0 and *sik1* mutants. (D) Relative expression of the *PR1* gene in Col-0 and *sik1* mutants using qPCR. In panels (C and D) the data are shown as means  $\pm$  SD (n=3). (E) Anti-PR1 immunoblot demonstrating PR1 protein accumulation in wild-type Col-0 and *sik1* mutant lines at a resting state. CBB = Coomassie brilliant blue. (F) Other phytohormone levels in *sik1* mutant lines. Total jasmonic acid (JA), cis-(+)-12-oxo-phytodienoic acid (OPDA), and abscisic acid (ABA) levels in Col-0 and *sik1* mutant lines. Hormones were extracted from five-week-old plants. The data are shown as means  $\pm$  SD (n=3). Asterisks indicate significant differences (Dunnett's test,  $p < 0.01$ ). Similar results were obtained in three independent experiments.

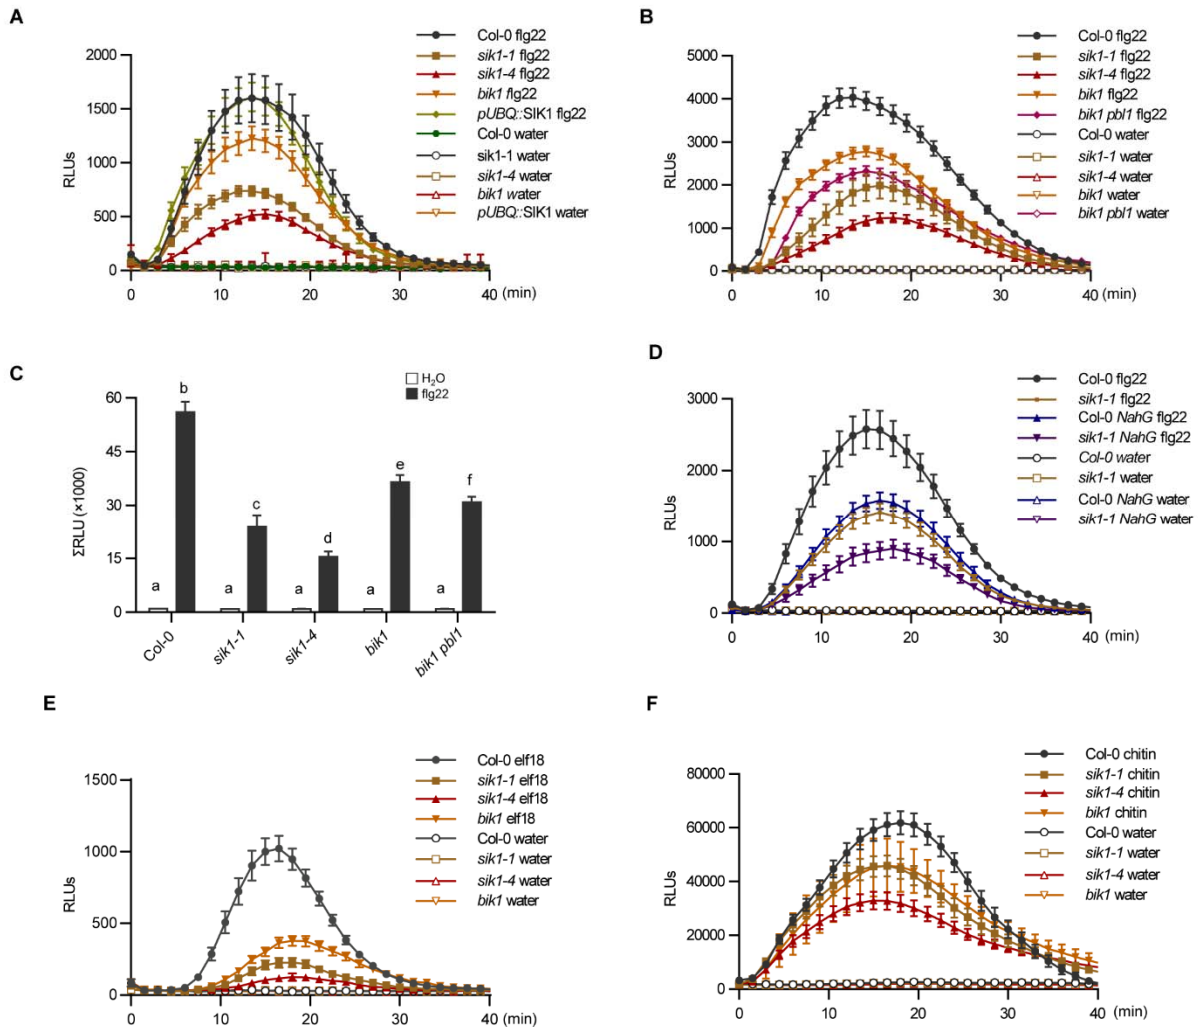

**Figure S5. Related to Figure 4. Compromised PAMP-induced ROS burst in *sik1* mutants.**

(A and B) The ROS burst in the indicated lines after treatment with 100 nM flg22 or water. Total relative luminescent units (RLU) were detected over a 40-min period. Values are means  $\pm$  SEM of RLU (A, n=12; B, n=14). (C) The ROS in the indicated lines after treatment with 100 nM flg22 or water. Total relative luminescent units (RLU) were detected over a 40-min period. Values are means  $\pm$  SEM of RLU (n=14). Asterisks indicate significant differences (Dunnett's test,  $p < 0.01$ ). (D) The ROS burst in the indicated lines after treatment with 100 nM flg22 or water. Values are means  $\pm$  SEM of RLU (n=18). (E) The ROS burst in the indicated lines after treatment with 100 nM elf18 or water. Values are means  $\pm$  SEM of RLU (n=12). (F) The ROS burst in the indicated lines after treatment with 10  $\mu$ M chitin or water. Values are means  $\pm$  SEM of RLU (n=18). These experiments were repeated at least twice with similar results.



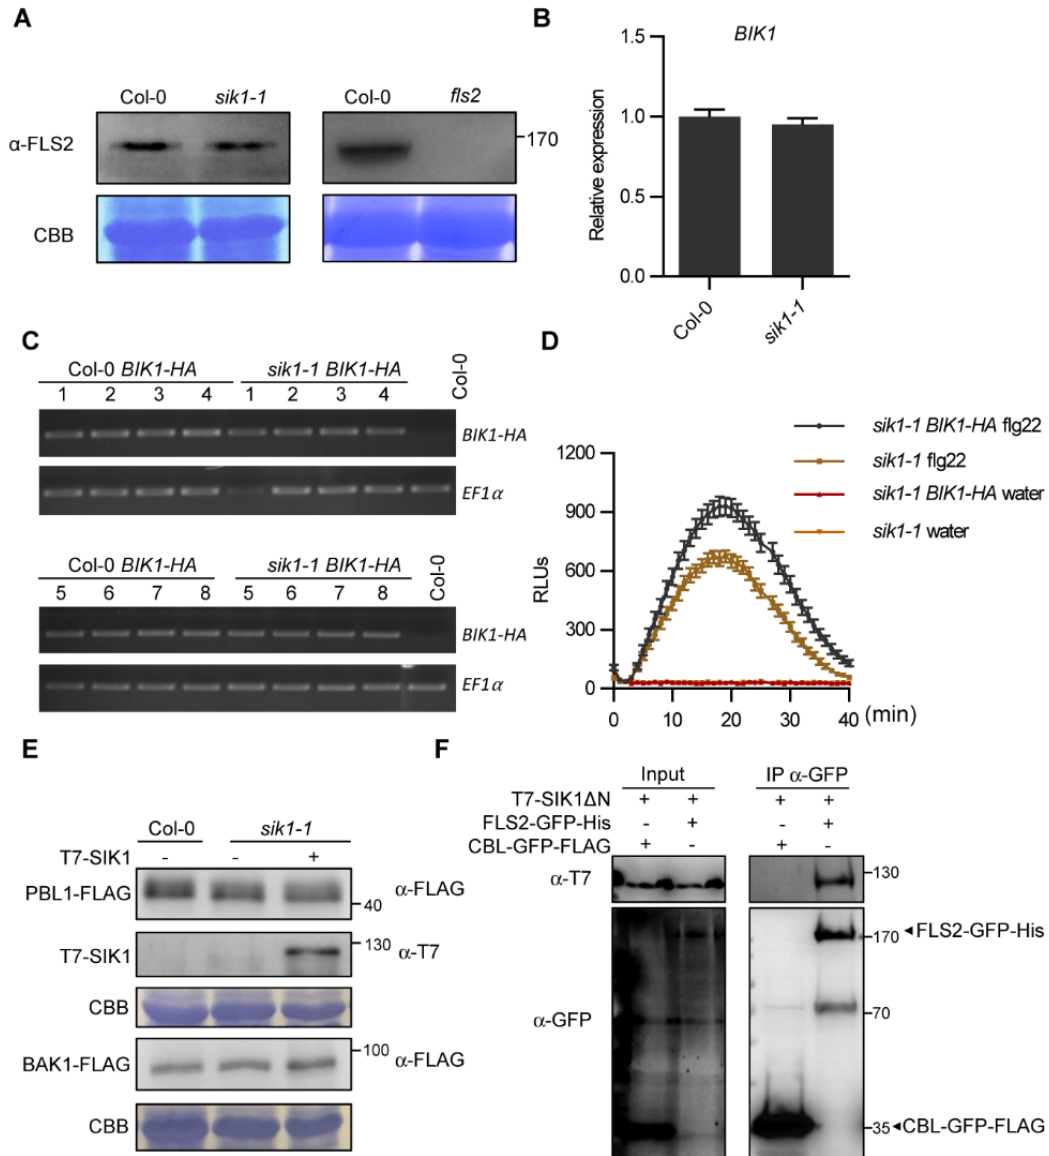

**Figure S6. Related to Figure 6. SIK1 specifically affects BIK1 protein accumulation and can associate with the FLS2 immune receptor.**(A) FLS2 abundance is not altered in *sik1-1*. Total proteins from Col-0, *fls2*, and *sik1-1* plants were extracted and FLS2 protein was detected by anti-FLS2 immunoblot analyses. CBB = Coomassie brilliant blue. (B) Relative expression of *BIK1* in indicated lines using qPCR. Data are shown as means  $\pm$  SD (n=3). (C) Relative transcript expression of *BIK1-HA* in independent transgenic lines using RT-PCR. *EF1α* was used as a reference. (D) The ROS burst in the indicated lines after treatment with 100 nM flg22 or water. Values are means  $\pm$  SEM of RLU (n=14). (E) PBL1 accumulation is not affected in *sik1-1*. *PBL1-FLAG*, *BAK1-FLAG*, and *T7-SIK1* plasmids were expressed in Col-0 and *sik1-1* protoplasts. Protein levels were determined by immunoblot analyses. (F) Co-immunoprecipitation of T7-SIK1ΔN and FLS2-GFP-his after co-expression in *Nicotiana benthamiana*.

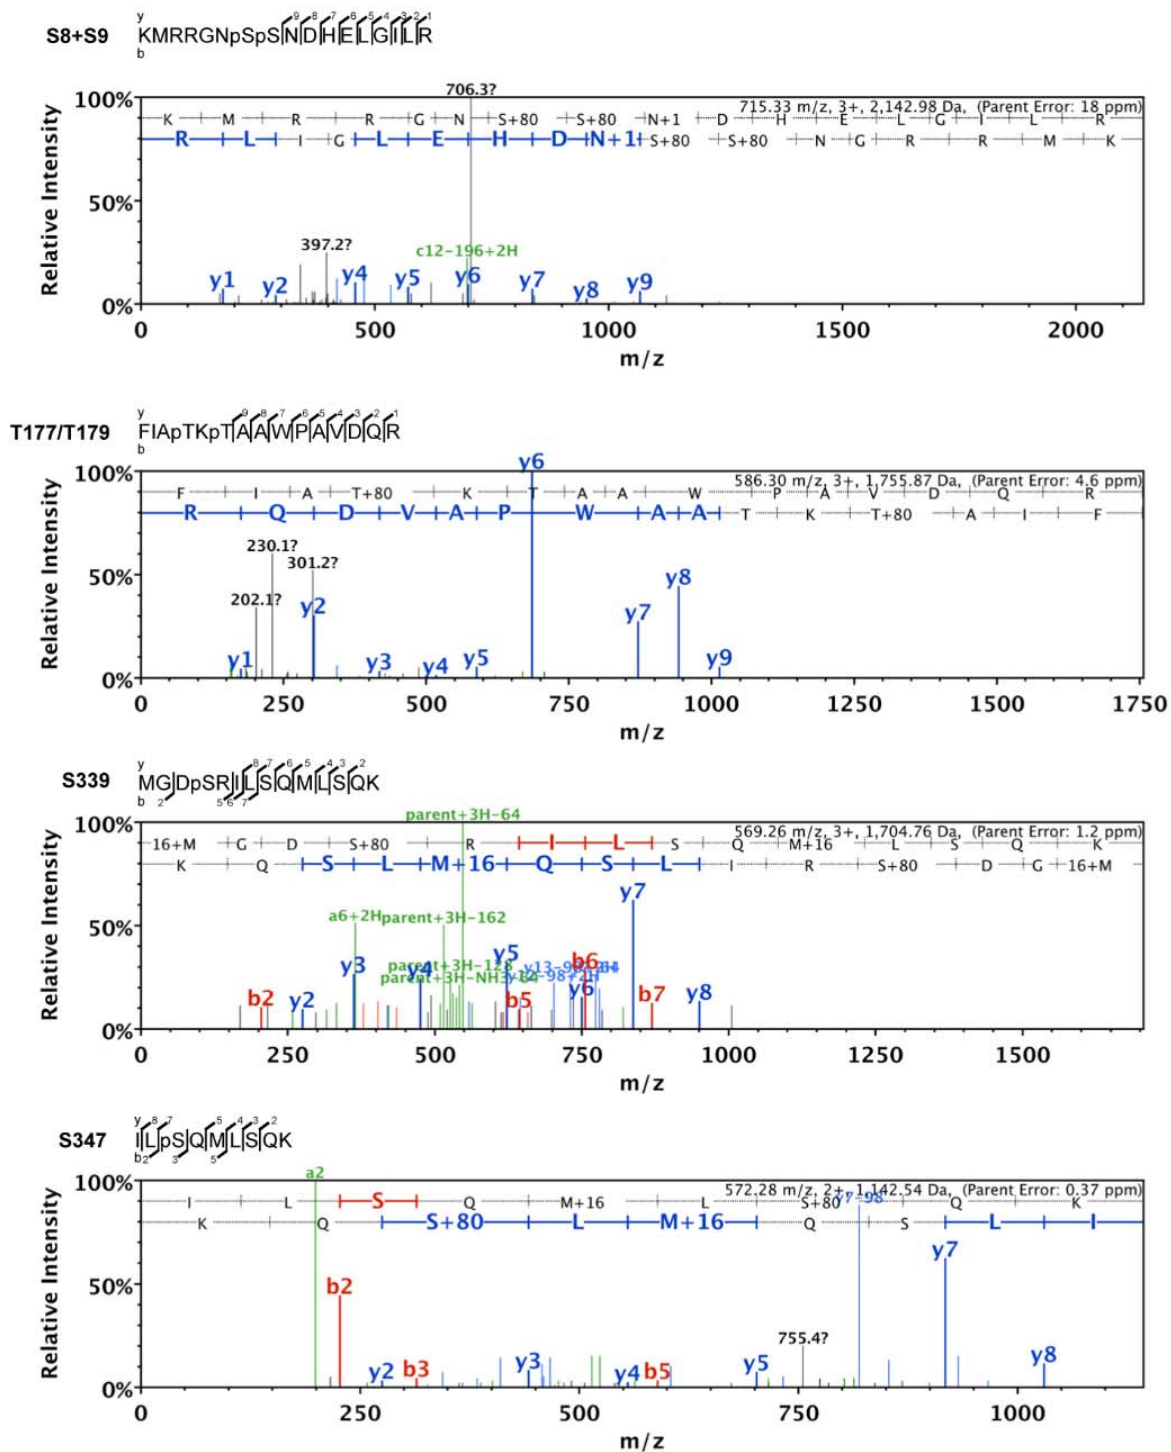

**Figure S7. Related to Figure 7. MS/MS spectra of phosphopeptides in RBOHD's N-terminus.** MS2 mass spectra after *in vitro* kinase assay with MBP-SIK1 $\Delta$ N but not the kinase dead variant MBP-SIK1 $\Delta$ N<sup>KD</sup>.



## Supplemental Tables

Table S1. Related to Figure 5. Phosphorylated BIK1 residues identified by LC/MS/MS.

| Phosphorylation sites | Peptide modified sequence     | Probability | Site ambiguity | Previously identified | Description                       | Reference                                                                 |  |  |  |  |
|-----------------------|-------------------------------|-------------|----------------|-----------------------|-----------------------------------|---------------------------------------------------------------------------|--|--|--|--|
| S26                   | SSDLYGLS[+80]LSSR             | 98%         | No             | Yes                   | by autocatalysis and BAK1.        | Lin et al., 2014                                                          |  |  |  |  |
| S32                   | KS[+80]SSTVAAAQKTEGEILSSSTPVK | 99%         | Yes            | Yes                   | by autocatalysis.                 | Lin et al., 2014                                                          |  |  |  |  |
| S33                   | KSS[+80]STVAAAQKTEGEILSSSTPVK | 99%         | Yes            | Yes                   | by autocatalysis.                 | Laluk et al., 2011; Lin et al., 2014; Xu et al., 2013                     |  |  |  |  |
| S34                   | KSSS[+80]TVAAAQKTEGEILSSSTPVK | 99%         | Yes            | No                    |                                   |                                                                           |  |  |  |  |
| T35                   | KSSST[+80]VAAAQKTEGEILSSSTPVK | 99%         | No             | Yes                   | by autocatalysis.                 | Laluk et al., 2011; Lin et al., 2014                                      |  |  |  |  |
| T42                   | KSSSTVAAAQKT[+80]EGEILSSSTPVK | 99%         | No             | Yes                   | by autocatalysis.                 | Laluk et al., 2011; Lin et al., 2014                                      |  |  |  |  |
| T50                   | KSSSTVAAAQKTEGEILSST[+80]PVK  | 99%         | No             | No                    |                                   |                                                                           |  |  |  |  |
| S54                   | TEGEILSSSTPVKS[+80]FTFNELK    | 91%         | No             | Yes                   | by autocatalysis.                 | Lin et al., 2014; Xu et al., 2013                                         |  |  |  |  |
| T56                   | TEGEILSSSTPVKSFT[+80]FNELK    | 91%         | Yes            | Yes                   | by autocatalysis.                 | Lin et al., 2014; Xu et al., 2013                                         |  |  |  |  |
| T64                   | LAT[+80]RNFPRPDSVIGEGGFQCVFK  | 99%         | Yes            | Yes                   |                                   | Laluk et al., 2011                                                        |  |  |  |  |
| S71                   | NFRPDS[+80]VIGEGGFQCVFK       | 99%         | No             | Yes                   | by autocatalysis and BAK1.        | Xu et al., 2013                                                           |  |  |  |  |
| T120                  | EWLT[+80]EINYLQQLSHPNLVK      | 99%         | No             | No                    |                                   |                                                                           |  |  |  |  |
| Y168                  | GAY[+80]FKPLPWFLR             | 98%         | No             | Yes                   | by autocatalysis and BAK1.        | Xu et al., 2013                                                           |  |  |  |  |
| S193                  | GLAFLHS[+80]DPVKVIYR          | 98%         | No             | No                    |                                   |                                                                           |  |  |  |  |
| S206                  | DIKAS[+80]NILLDADYNAK         | 99%         | No             | Yes                   | by autocatalysis and BAK1.        | Laluk et al., 2011; Lin et al., 2014; Xu et al., 2013                     |  |  |  |  |
| S219                  | ASNILLDADYNAKLS[+80]DFGLAR    | 95%         | No             | No                    |                                   |                                                                           |  |  |  |  |
| S233                  | DGPMGDLS[+80]YVSTR            | 99%         | No             | Yes                   | by autocatalysis and BAK1.        | Laluk et al., 2011; Lin et al., 2014; Xu et al., 2013                     |  |  |  |  |
| S236                  | DGPMGDLSYVS[+80]TR            | 99%         | No             | Yes                   | by autocatalysis, BAK1 and PEPR1. | Laluk et al., 2011; Lin et al., 2014; Xu et al., 2013; Zhang et al., 2010 |  |  |  |  |
| T314                  | VLLIVDNRLDT[+80]QYLPPEAVR     | 99%         | No             | Yes                   | by autocatalysis.                 | Xu et al., 2013                                                           |  |  |  |  |
| T341                  | SRPT[+341]MDQVVR              | 97%         | No             | No                    |                                   |                                                                           |  |  |  |  |
| S360                  | ALQQLQDNLGKPS[+80]QTNPVKDTKK  | 98%         | Yes            | Yes                   | by autocatalysis.                 | Xu et al., 2013                                                           |  |  |  |  |
| T362                  | ALQQLQDNLGKPSQT[+80]NPVKDTKK  | 98%         | Yes            | Yes                   | by autocatalysis and BAK1.        | Lin et al., 2014; Xu et al., 2013                                         |  |  |  |  |
| T368                  | ALQQLQDNLGKPSQTNPVKDT[+80]KK  | 99%         | No             | Yes                   | by autocatalysis and BAK1.        | Lin et al., 2014; Xu et al., 2013                                         |  |  |  |  |
| T375                  | LGFKT[+80]GTTKSSEKR           | 93%         | No             | Yes                   | by autocatalysis.                 | Lin et al., 2014                                                          |  |  |  |  |
| T377                  | LGFKTG[+80]TKSSEKR            | 93%         | No             | No                    |                                   |                                                                           |  |  |  |  |

**Table S2. Related to STAR Methods. T-DNA insertion lines and accession numbers.**

| <b>Gene</b>                      | <b>Locus</b> | <b>Allele</b>  | <b>Stock number</b> |
|----------------------------------|--------------|----------------|---------------------|
| <i>MAP4K1</i>                    | AT1G53165    | <i>m4k1-1</i>  | SALK_060372         |
| <i>MAP4K2</i>                    | AT3G15220    | <i>m4k2-2</i>  | CS925354            |
| <i>MAP4K3</i><br>( <i>SIK1</i> ) | AT1G69220    | <i>sik1-1</i>  | SALK_046158         |
|                                  |              | <i>sik1-4</i>  | SALK_051369         |
| <i>MAP4K4</i>                    | AT5G14720    | <i>m4k4-1</i>  | SALK_065417         |
| <i>MAP4K5</i>                    | AT4G24100    | <i>m4k5-1</i>  | SALK_208908         |
| <i>MAP4K6</i>                    | AT4G10730    | <i>m4k6-2</i>  | SALK_127267         |
| <i>MAP4K7</i>                    | AT1G70430    | <i>m4k7-1</i>  | SALK_108286         |
| <i>MAP4K8</i>                    | AT1G79640    | <i>m4k8-1</i>  | SALK_067866         |
| <i>MAP4K9</i>                    | AT1G23700    | <i>m4k9-2</i>  | SALK_152867         |
| <i>MAP4K10</i>                   | AT4G14480    | <i>m4k10-1</i> | SALK_202941         |
| <i>FLS2</i>                      | AT5G46330    | <i>fls2</i>    | SALK_062054         |
| <i>BIK1</i>                      | AT2G39660    | <i>bik1</i>    | SALK_005291         |

**Table S3. Related to STAR Methods. Primers used in this study.**

| <b>Name</b> | <b>Sequence 5' to 3'</b>  | <b>Purpose</b>                       |
|-------------|---------------------------|--------------------------------------|
| LBb1.3      | ATTTTGCCGATTTTCGGAAC      | T-DNA left border primer             |
| M4K1-LP     | AGGTTCTCCTTTTGCCATCTC     | <i>m4k1-1</i> T-DNA line genotyping  |
| M4K1-RP     | CATGGAATATATGGCTGGTGG     |                                      |
| M4K2-LP     | TCCATCATCACAAAGGGATCTC    | <i>m4k2-2</i> T-DNA line genotyping  |
| M4K2-RP     | GGGAACTTGGTTAAGTTTCACG    |                                      |
| M4K3-LP1    | TGTCCAAATCATCCACATGTG     | <i>sik1-1</i> T-DNA line genotyping  |
| M4K3-RP1    | ATGGTTTCGAAAATGCAGATTG    |                                      |
| M4K3-LP2    | ATTTGGTATCTGGATTGGCAG     | <i>sik1-4</i> T-DNA line genotyping  |
| M4K3-RP2    | TGTGGAGTCCCAATGAACTTC     |                                      |
| M4K3-LP3    | CAGCTATTGAGATGGCAGAGG     | <i>sik1-5</i> T-DNA line genotyping  |
| M4K3-RP3    | TCAGAGCGCTTAAAGGTCAAC     |                                      |
| M4K4-LP     | TTGCATTATCCTCGTCCTCAC     | <i>m4k4-1</i> T-DNA line genotyping  |
| M4K4-RP     | CAAAAGATTCTCGAAAGTGCG     |                                      |
| M4K5-LP     | TCAAACAGTTTGTCTGCTCCC     | <i>m4k5-1</i> T-DNA line genotyping  |
| M4K5-RP     | CTCTGAAGCCACAGGTTCAAC     |                                      |
| M4K6-LP     | ACTAGAAGATGTCCAGCTGCG     | <i>m4k6-2</i> T-DNA line genotyping  |
| M4K6-RP     | ATGATTTCAAGTTGCCGTTTAC    |                                      |
| M4K7-LP     | GGTCACAGACTATGCCTTTGG     | <i>m4k7-1</i> T-DNA line genotyping  |
| M4K7-RP     | TAACCTGATTACTTGCGCCTG     |                                      |
| M4K8-LP     | ACACCTGAATCTCCGATTGTG     | <i>m4k8-1</i> T-DNA line genotyping  |
| M4K8-RP     | TTCTTCTTGTACAGGATGGC      |                                      |
| M4K9-LP     | TTTCATGATTGTTTTTCAGGTGC   | <i>m4k9-2</i> T-DNA line genotyping  |
| M4K9-RP     | ACCAGCAGTTGGATCACAGAG     |                                      |
| M4K10-LP    | CGTGGACTGGACTCAGAAGAG     | <i>m4k10-1</i> T-DNA line genotyping |
| M4K10-RP    | CTTGATGCTGAAGCCTACGAG     |                                      |
| M4K1-RT-F   | ATGGATGATGTTGCTGGTTTAC    | Full length <i>MAP4K1</i> CDS        |
| M4K1-RT-R   | TCAACTTTGGTTAAGATCACGC    |                                      |
| M4K2-RT-F   | ATGGACGATGTTGCGGGTTTAC    | Full length <i>MAP4K2</i> CDS        |
| M4K2-RT-R   | TTAAAGATCACGTGATGATTGGC   |                                      |
| SIK1-RT-F   | ATGGATCATAACTCGCCGAAATC   | Full length <i>SIK1</i> CDS          |
| SIK1-RT-R   | TTAGAGGCGGAGAATAGTGCG     |                                      |
| M4K4-RT-F   | ATGGAATCGGGTTCAGAGAAAAG   | Full length <i>MAP4K4</i> CDS        |
| M4K4-RT-R   | TCAATCATTTCTGTGTGTTAATGC  |                                      |
| M4K5-RT-F   | ATGGTGGGAGGAGGAGGAGG      | Full length <i>MAP4K5</i> CDS        |
| M4K5-RT-R   | TTAGTGTTTCGCGACCCGTGAATG  |                                      |
| M4K6-RT-F   | ATGGTGTCTCGGTTTCGTCTTG    | Full length <i>MAP4K6</i> CDS        |
| M4K6-RT-R   | TTACAATTGCTCGCGACCGGT     |                                      |
| M4K7-RT-F   | ATGGCTGGTTCATCAACGAAAC    | Full length <i>MAP4K7</i> CDS        |
| M4K7-RT-R   | TTAAGAGATGTTGTTGCTGCTAATC |                                      |
| M4K8-RT-F   | ATGGGTACAATGGAGAAGAAGAAG  | Full length <i>MAP4K8</i> CDS        |
| M4K8-RT-R   | TTAGTTACTCATACTTACTTGGGC  |                                      |

|                       |                                                              |                                                   |
|-----------------------|--------------------------------------------------------------|---------------------------------------------------|
| M4K9-RT-F             | ATGACGAGTTCACCGGAAACG                                        | Full length <i>MAP4K9</i><br>CDS                  |
| M4K9-RT-R             | TTAAAGCTTGTGGAATTTATCATTAC<br>C                              |                                                   |
| M4K10-RT-F            | ATGGCTCGGAACAAGCTCGAG                                        | Full length <i>MAP4K10</i><br>CDS                 |
| M4K10-RT-R            | TTAACCCAAAACACTATCTTTATCA<br>GC                              |                                                   |
| PR1-F                 | CGGAGCTACGCAGAACAACCT                                        | qPCR                                              |
| PR1-R                 | CTCGCTAACCCACATGTTCA                                         |                                                   |
| EF-1 $\alpha$ -F      | CTGGATTCGAGGGAGACAACA                                        | qPCR                                              |
| EF-1 $\alpha$ -R      | GCACCGTTCCAATACCACCAA                                        |                                                   |
| BIK1-RT-F             | TGGGCTCGACCGTACCTCACA                                        | qPCR                                              |
| BIK1-RT-R             | CGGGCGCGACTTGGGTTCAA                                         |                                                   |
| BIK1-HA-RT-F          | CAGGACAACCTTGGGAAAACCG                                       | T-PCR                                             |
| BIK1-HA-RT-R          | TAGGATCCTGCATAGTCCGGG                                        |                                                   |
| NahG-F                | CACCATGAAAAACAATAAACTTGGC<br>TTGCGC                          | Clone <i>NahG</i> gene                            |
| NahG-R                | CCCTTGACGTAGCGCACCC                                          |                                                   |
| SIK1-F                | CACCATGGATCATAACTCGCCGAA<br>ATC                              | Clone <i>SIK1</i> gene                            |
| SIK1-R                | TTAGAGGCGGAGAATAGTGCGAAG                                     |                                                   |
| SIK1 $\Delta$ N -F    | CACCATGTACGAATTCCTCAATGAA<br>CTTG                            | Clone <i>SIK1<math>\Delta</math>N</i>             |
| SIK1-K278E-F          | CAGAGATTGTTGCTGTGGAAGTCA<br>TATCACTTAC                       |                                                   |
| SIK1-K278E-R          | GTAAGTGATATGACTTCCACAGCAA<br>CAATCTCTG                       | Generate <i>SIK1</i><br>mutant (K278E)            |
| BAK1-F                | CCGCTCGAGATGGAACGAAGATTA<br>ATGAT                            | Clone <i>BAK1</i> gene<br>into pUC19-35S-<br>FLAG |
| BAK1-R                | TTTATATTCGAATCTTGGACCCGAG<br>GGGTATT                         |                                                   |
| PBL1-KpnI-F           | CGGGTACCATGGGTTCTTGTCTCA<br>GTTC                             | Clone <i>PBL1</i> into<br>pUC19-35S-FLAG          |
| PBL1-BstBI-R          | AGGTTTGAACAATCCAACGGTTTT<br>TTTGTAAACC                       |                                                   |
| RBOHD-F               | CACCATGAAAATGAGACGAGGCAA                                     | Clone <i>RBOHD-N</i> into<br>MBP tag vector       |
| RBOHD-N-R             | CTATCTCTGCCAATTGTCAAGTAT                                     |                                                   |
| HA/His-MBP-<br>BSK1-F | AAAACCTGTACTTCCAATCCAATAT<br>GGGTTGTTGTCAATCCTTGTTC<br>GGC   | Clone <i>BSK1</i> gene<br>into MBP tag vector     |
| HA/His-MBP-<br>BSK1-R | GGATCCGTTATCCACTTCCAATTCA<br>AGATCCTCTGCCGCCTCGTTGTCT<br>CTT |                                                   |
| GST-RbohD-N-<br>F     | GAAAACCTGTACTTCCAATCCAATA<br>TGAAAATGAGACGAGGCAATTCA         | Clone <i>RBOHD-N</i> into<br>GST tag vector       |

|                  |                                                    |                                                      |
|------------------|----------------------------------------------------|------------------------------------------------------|
| GST-RbohD-N-R    | CGGATCCGTTATCCACTTCCAATTC<br>ATCTCTGCCAATTGTCAAGTA | Clone <i>RBOHD-N</i> into<br>GST tag vector          |
| GST/MBP-SIK1ΔN-F | CCTGTACTTCCAATCCAATGAATTC<br>CTCAATGAACTTGGG       | Clone <i>SIK1ΔN</i> into<br>GST or MBP tag<br>vector |
| GST/MBP-SIK1ΔN-R | CCGTTATCCACTTCCAATTTAGAGG<br>CGGAGAATAGTGCGA       |                                                      |
| His-MBP-BIK1-F   | CTGTACTTCCAATCCAATATGGGTT<br>CTTGCTTCAGT           | Clone <i>BIK1</i> into MBP<br>tag vector             |
| His-MBP-BIK1-R   | CCGTTATCCACTTCCAATTTACACA<br>AGGTGCCTGCCAAA        |                                                      |

**Table S4. Related to Figure 7. Isolation list for PRM.** Modified and unmodified peptide sequences used to quantify phosphorylation by PRM are noted. CID = collision induced dissociation, m/z = mass to charge, z = charge state.

| Peptide sequence | Peptide modified sequence | m/z     | z | CID Collision Energy (%) |
|------------------|---------------------------|---------|---|--------------------------|
| GNSSNDHELGILR    | GNSSNDHELGILR             | 706.35  | 2 | 27                       |
|                  | GNS[+80]SNDHELGILR        | 746.333 | 2 | 27                       |
|                  | GNSS[+80]NDHELGILR        | 746.333 | 2 | 27                       |
|                  | GNS[+80]S[+80]NDHELGILR   | 786.316 | 2 | 27                       |
| ILSQMLSQK        | ILSQMLSQK                 | 524.297 | 2 | 27                       |
|                  | ILS[+80]QMLSQK            | 564.28  | 2 | 27                       |
|                  | ILSQM[+16]LSQK            | 532.294 | 2 | 27                       |
|                  | ILSQMLS[+80]QK            | 564.28  | 2 | 27                       |
|                  | ILS[+80]QM[+16]LSQK       | 572.278 | 2 | 27                       |
|                  | ILS[+80]QMLS[+80]QK       | 604.263 | 2 | 27                       |
|                  | ILSQM[+16]LS[+80]QK       | 572.278 | 2 | 27                       |
|                  | ILS[+80]QM[+16]LS[+80]QK  | 612.261 | 2 | 27                       |
